# Supplementary material for: Identification of Candidate Genes for Economically Important Carcass Cutting in Commercial Pigs through GWAS
Source: MDPI journal article supplement (doi:10.3390/ani13203243), 2023-10-18
Supplement: s1 [file s1]

**Table S3.** The distribution of genes within a 1 Mb range around significantly associated SNPs for the TLNW trait.

| SNP         | SSC <sup>1</sup> | Postion/ bp | Distance/ kb <sup>2</sup> | Gene            |
|-------------|------------------|-------------|---------------------------|-----------------|
| ASGA0085853 | 12               | 3,284,259   | 145.42                    | <i>RBFOX3</i>   |
| ASGA0085853 | 12               | 3,284,259   | 134.92                    | <i>ENGASE</i>   |
| ASGA0085853 | 12               | 3,284,259   | 114.18                    | <i>C1QTNF1</i>  |
| ASGA0085853 | 12               | 3,284,259   | 79.77                     | <i>CANT1</i>    |
| ASGA0085853 | 12               | 3,284,259   | 61.55                     | <i>LGALS3BP</i> |
| ASGA0085853 | 12               | 3,284,259   | within                    | <i>TIMP2</i>    |
| ASGA0085853 | 12               | 3,284,259   | -24.98                    | <i>USP36</i>    |
| ASGA0085853 | 12               | 3,284,259   | -71.99                    | <i>CYTH1</i>    |
| ASGA0085853 | 12               | 3,284,259   | -198.39                   | <i>DNAH17</i>   |
| ASGA0085853 | 12               | 3,284,259   | -305.28                   | <i>PGS1</i>     |
| ASGA0085853 | 12               | 3,284,259   | -359.67                   | <i>SOC53</i>    |
| ASGA0085853 | 12               | 3,284,259   | -463.02                   | <i>BIRC5</i>    |
| ASGA0085853 | 12               | 3,284,259   | -475.45                   | <i>AFMID</i>    |
| ALGA0112188 | 7                | 120,821,692 | 335.01                    | <i>SETD3</i>    |
| ALGA0112188 | 7                | 120,821,692 | 307.68                    | <i>CCNK</i>     |
| ALGA0112188 | 7                | 120,821,692 | 224.00                    | <i>CCDC85C</i>  |
| ALGA0112188 | 7                | 120,821,692 | 126.68                    | <i>CYP46A1</i>  |
| ALGA0112188 | 7                | 120,821,692 | Within                    | <i>EML1</i>     |
| ALGA0112188 | 7                | 120,821,692 | -89.96                    | <i>EVL</i>      |
| ALGA0112188 | 7                | 120,821,692 | -236.41                   | <i>DEGS2</i>    |
| ALGA0112188 | 7                | 120,821,692 | -310.50                   | <i>YY1</i>      |
| ALGA0112188 | 7                | 120,821,692 | -370.74                   | <i>SLC25A47</i> |
| ALGA0112188 | 7                | 120,821,692 | -391.29                   | <i>WARS1</i>    |
| ALGA0112188 | 7                | 120,821,692 | -416.58                   | <i>WDR25</i>    |

<sup>1</sup> Sus scrofa chromosome (SSC). <sup>2</sup> The SNP located upstream/downstream of the gene (Distance).
