# Supplementary material for: Identification of Candidate Genes for Economically Important Carcass Cutting in Commercial Pigs through GWAS
Source: MDPI journal article supplement (doi:10.3390/ani13203243), 2023-10-18
Supplement: s1 [file s1]

**Table S1.** Distributions of SNPs after QC and the average SNPs on each chromosome for tenderloin weight (TLNW) traits.

| SSC | SNP no. | chr. size (Mb) <sup>1</sup> | SNP density (SNP/Mb) |
|-----|---------|-----------------------------|----------------------|
| 1   | 3425    | 274.33                      | 12.48                |
| 2   | 2376    | 151.94                      | 15.64                |
| 3   | 2216    | 132.85                      | 16.68                |
| 4   | 2207    | 130.91                      | 16.86                |
| 5   | 1688    | 104.53                      | 16.15                |
| 6   | 2268    | 170.84                      | 13.28                |
| 7   | 2123    | 121.84                      | 17.42                |
| 8   | 2147    | 138.97                      | 15.45                |
| 9   | 2347    | 139.51                      | 16.82                |
| 10  | 1170    | 69.36                       | 16.87                |
| 11  | 1486    | 79.17                       | 18.77                |
| 12  | 1040    | 61.60                       | 16.88                |
| 13  | 2736    | 208.33                      | 13.13                |
| 14  | 2282    | 141.76                      | 16.10                |
| 15  | 2097    | 140.41                      | 14.93                |
| 16  | 1343    | 79.94                       | 16.80                |
| 17  | 1093    | 63.49                       | 17.22                |
| 18  | 934     | 55.98                       | 16.68                |

<sup>1</sup>The physical size is based on *Sus scrofa* Build 11.1 ([http://www.ensembl.org/Sus\\_scrofa/Info/Index](http://www.ensembl.org/Sus_scrofa/Info/Index))
