# Supplementary material for: Identification of Candidate Genes for Economically Important Carcass Cutting in Commercial Pigs through GWAS
Source: MDPI journal article supplement (doi:10.3390/ani13203243), 2023-10-18
Supplement: s1 [file s1]

**Table S4.** The enrichment of protein-coding genes in KEGG pathway and GO terms.

| Term                                                        | Database      | ID         | Input number | P_Value     |
|-------------------------------------------------------------|---------------|------------|--------------|-------------|
| Other glycan degradation                                    | KEGG PATHWAY  | ssc00511   | 1            | 0.014797786 |
| Metabolic pathways                                          | KEGG PATHWAY  | ssc01100   | 4            | 0.021403412 |
| Glyoxylate and dicarboxylate metabolism                     | KEGG PATHWAY  | ssc00630   | 1            | 0.024036051 |
| Apoptosis - multiple species                                | KEGG PATHWAY  | ssc04215   | 1            | 0.025567719 |
| Tryptophan metabolism                                       | KEGG PATHWAY  | ssc00380   | 1            | 0.035467895 |
| Type II diabetes mellitus                                   | KEGG PATHWAY  | ssc04930   | 1            | 0.03698247  |
| Sphingolipid metabolism                                     | KEGG PATHWAY  | ssc00600   | 1            | 0.03698247  |
| Pyrimidine metabolism                                       | KEGG PATHWAY  | ssc00240   | 1            | 0.042265666 |
| Lysine degradation                                          | KEGG PATHWAY  | ssc00310   | 1            | 0.045272229 |
| negative regulation of ruffle assembly                      | Gene Ontology | GO:1900028 | 1            | 0.004695702 |
| 'de novo' NAD biosynthetic process from tryptophan          | Gene Ontology | GO:0034354 | 1            | 0.004695702 |
| positive regulation of exit from mitosis                    | Gene Ontology | GO:0031536 | 1            | 0.004695702 |
| peptidyl-lysine dimethylation                               | Gene Ontology | GO:0018027 | 1            | 0.004695702 |
| chromosome passenger complex protein                        | Gene Ontology | GO:0032133 | 1            | 0.005476275 |
| deglycosylation                                             | Gene Ontology | GO:0006517 | 1            | 0.005476275 |
| cyclin/CDK positive transcription elongation factor complex | Gene Ontology | GO:0008024 | 1            | 0.005476275 |
| profilin binding                                            | Gene Ontology | GO:0005522 | 1            | 0.006256264 |
| outer dynein arm histone                                    | Gene Ontology | GO:0036157 | 1            | 0.006256264 |
| methyltransferase activity (H3-K36 specific)                | Gene Ontology | GO:0046975 | 1            | 0.006256264 |
| response to organic substance                               | Gene Ontology | GO:0010033 | 1            | 0.006256264 |

|                                                                     |          |            |   |             |
|---------------------------------------------------------------------|----------|------------|---|-------------|
| peptidyl-lysine trimethylation                                      | Gene     |            |   |             |
| positive regulation of DNA-templated transcription, elongation      | Ontology | GO:0018023 | 1 | 0.006256264 |
| condensed chromosome kinetochore                                    | Gene     |            |   |             |
| negative regulation of membrane protein ectodomain proteolysis      | Ontology | GO:0032786 | 1 | 0.006256264 |
| peptidyl-lysine monomethylation                                     | Gene     |            |   |             |
| placenta blood vessel development                                   | Ontology | GO:0000777 | 1 | 0.006256264 |
| mitotic spindle midzone                                             | Gene     |            |   |             |
| negative regulation of platelet aggregation                         | Ontology | GO:0051045 | 1 | 0.006256264 |
| cyclin-dependent protein serine/threonine kinase activator activity | Gene     |            |   |             |
| branching involved in labyrinthine layer morphogenesis              | Ontology | GO:0018026 | 1 | 0.007035671 |
| NAD biosynthetic process                                            | Gene     |            |   |             |
| ATP-dependent microtubule motor activity, minus-end-directed        | Ontology | GO:0060674 | 1 | 0.007035671 |
| actin nucleation                                                    | Gene     |            |   |             |
| negative regulation of epithelial cell migration                    | Ontology | GO:1990023 | 1 | 0.007035671 |
| negative regulation of tyrosine phosphorylation of STAT protein     | Gene     |            |   |             |
| microtubule binding                                                 | Ontology | GO:0090331 | 1 | 0.007035671 |
| 1-phosphatidylinositol-3-kinase regulator activity                  | Gene     |            |   |             |
|                                                                     | Ontology | GO:0061575 | 1 | 0.007035671 |
|                                                                     | Gene     |            |   |             |
|                                                                     | Ontology | GO:0060670 | 1 | 0.007035671 |
|                                                                     | Gene     |            |   |             |
|                                                                     | Ontology | GO:0009435 | 1 | 0.007814496 |
|                                                                     | Gene     |            |   |             |
|                                                                     | Ontology | GO:0008569 | 1 | 0.007814496 |
|                                                                     | Gene     |            |   |             |
|                                                                     | Ontology | GO:0045010 | 1 | 0.007814496 |
|                                                                     | Gene     |            |   |             |
|                                                                     | Ontology | GO:0010633 | 1 | 0.007814496 |
|                                                                     | Gene     |            |   |             |
|                                                                     | Ontology | GO:0042532 | 1 | 0.007814496 |
|                                                                     | Gene     |            |   |             |
|                                                                     | Ontology | GO:0008017 | 2 | 0.008036249 |
|                                                                     | Gene     |            |   |             |
|                                                                     | Ontology | GO:0046935 | 1 | 0.008592738 |

|                                                                                            |          |             |   |             |
|--------------------------------------------------------------------------------------------|----------|-------------|---|-------------|
| trophoblast giant cell differentiation                                                     | Gene     |             |   |             |
|                                                                                            | Ontology | GO:0060707  | 1 | 0.008592738 |
| dynein complex                                                                             | Gene     |             |   |             |
| protein-lysine N-methyltransferase activity                                                | Ontology | GO:0030286  | 1 | 0.0093704   |
| histone methyltransferase activity (H3-K4 specific)                                        | Gene     |             |   |             |
|                                                                                            | Ontology | GO:0016279  | 1 | 0.0093704   |
| regulation of insulin secretion involved in cellular response to glucose stimulus          | Gene     |             |   |             |
| proteoglycan biosynthetic process                                                          | Ontology | GO:0061178  | 1 | 0.0093704   |
| regulation of glucose metabolic process                                                    | Gene     |             |   |             |
| metalloendopeptidase inhibitor activity                                                    | Ontology | GO:0030166  | 1 | 0.0093704   |
| RNA polymerase II CTD heptapeptide repeat kinase activity                                  | Gene     |             |   |             |
| chromosome, centromeric region                                                             | Ontology | GO:0010906  | 1 | 0.01014748  |
| outer dynein arm assembly                                                                  | Gene     |             |   |             |
| dynein light intermediate chain binding                                                    | Ontology | GO:0008191  | 1 | 0.01014748  |
| neuroblast proliferation                                                                   | Gene     |             |   |             |
| negative regulation of apoptotic process                                                   | Ontology | GO:0008353  | 1 | 0.01014748  |
|                                                                                            | Gene     |             |   |             |
|                                                                                            | Ontology | GO:0000775  | 1 | 0.01014748  |
| amino acid transport                                                                       | Gene     |             |   |             |
| phosphatidylinositol 3-kinase complex regulation of phosphatidylinositol 3-kinase activity | Ontology | GO:000775   | 1 | 0.01014748  |
|                                                                                            | Gene     |             |   |             |
|                                                                                            | Ontology | GO:0036158  | 1 | 0.01092398  |
| PcG protein complex positive regulation of cell differentiation                            | Gene     |             |   |             |
| ARF guanyl-nucleotide exchange factor activity                                             | Ontology | GO:0051959  | 1 | 0.01092398  |
|                                                                                            | Gene     |             |   |             |
|                                                                                            | Ontology | GO:0007405  | 1 | 0.01092398  |
|                                                                                            | Gene     |             |   |             |
|                                                                                            | Ontology | GO:00043066 | 2 | 0.011229508 |
|                                                                                            | Gene     |             |   |             |
|                                                                                            | Ontology | GO:0006865  | 1 | 0.0116999   |
|                                                                                            | Gene     |             |   |             |
|                                                                                            | Ontology | GO:0005942  | 1 | 0.01247524  |
|                                                                                            | Gene     |             |   |             |
|                                                                                            | Ontology | GO:0043551  | 1 | 0.01247524  |
|                                                                                            | Gene     |             |   |             |
|                                                                                            | Ontology | GO:0031519  | 1 | 0.01247524  |
|                                                                                            | Gene     |             |   |             |
|                                                                                            | Ontology | GO:0045597  | 1 | 0.01247524  |
|                                                                                            | Gene     |             |   |             |
|                                                                                            | Ontology | GO:0005086  | 1 | 0.013250001 |

|                                                       |                  |            |   |             |
|-------------------------------------------------------|------------------|------------|---|-------------|
| regulation of ARF<br>protein signal<br>transduction   | Gene<br>Ontology | GO:0032012 | 1 | 0.013250001 |
| dynein intermediate<br>chain binding                  | Gene<br>Ontology | GO:0045505 | 1 | 0.013250001 |
| receptor signaling<br>pathway via JAK-<br>STAT        | Gene<br>Ontology | GO:0007259 | 1 | 0.013250001 |
| mitotic spindle pole                                  | Gene<br>Ontology | GO:0097431 | 1 | 0.013250001 |
| nuclear chromatin<br>negative regulation of           | Gene<br>Ontology | GO:0000790 | 2 | 0.013395221 |
| insulin receptor<br>signaling pathway                 | Gene<br>Ontology | GO:0046627 | 1 | 0.014024183 |
| response to hormone                                   | Gene<br>Ontology | GO:0009725 | 1 | 0.014024183 |
| actin polymerization<br>or depolymerization           | Gene<br>Ontology | GO:0008154 | 1 | 0.014024183 |
| positive regulation of<br>cyclin-dependent<br>protein |                  |            |   |             |
| serine/threonine<br>kinase activity                   | Gene<br>Ontology | GO:0045737 | 1 | 0.014024183 |
| mitotic spindle<br>assembly checkpoint                | Gene<br>Ontology | GO:0007094 | 1 | 0.014024183 |
| cysteine-type<br>endopeptidase<br>inhibitor activity  |                  |            |   |             |
| involved in apoptotic<br>process                      | Gene<br>Ontology | GO:0043027 | 1 | 0.014797786 |
| cilium movement                                       | Gene<br>Ontology | GO:0003341 | 1 | 0.014797786 |
| response to cytokine                                  | Gene<br>Ontology | GO:0034097 | 1 | 0.015570811 |
| cyclin-dependent<br>protein                           |                  |            |   |             |
| serine/threonine<br>kinase activity                   | Gene<br>Ontology | GO:0004693 | 1 | 0.017115129 |
| ceramide biosynthetic<br>process                      | Gene<br>Ontology | GO:0046513 | 1 | 0.018657139 |
| mitotic spindle<br>assembly                           | Gene<br>Ontology | GO:0090307 | 1 | 0.020196845 |
| positive regulation of<br>mitotic cell cycle          | Gene<br>Ontology | GO:0045931 | 1 | 0.020965835 |
| protein                                               | Gene             |            |   |             |
| phosphorylation                                       | Ontology         | GO:0006468 | 2 | 0.021286943 |
| phosphotyrosine<br>residue binding                    | Gene<br>Ontology | GO:0001784 | 1 | 0.021734251 |
| spindle microtubule                                   | Gene<br>Ontology | GO:0005876 | 1 | 0.021734251 |

|                                                                                                       |                  |            |   |             |
|-------------------------------------------------------------------------------------------------------|------------------|------------|---|-------------|
| cyclin-dependent<br>protein<br>serine/threonine<br>kinase regulator<br>activity                       | Gene<br>Ontology | GO:0016538 | 1 | 0.022502091 |
| sperm flagellum                                                                                       | Gene<br>Ontology | GO:0036126 | 1 | 0.023269358 |
| tubulin binding                                                                                       | Gene<br>Ontology | GO:0015631 | 1 | 0.025567719 |
| positive regulation of<br>stress fiber assembly                                                       | Gene<br>Ontology | GO:0051496 | 1 | 0.025567719 |
| G2/M transition of<br>mitotic cell cycle                                                              | Gene<br>Ontology | GO:0000086 | 1 | 0.025567719 |
| positive regulation of<br>actin filament<br>polymerization                                            | Gene<br>Ontology | GO:0030838 | 1 | 0.026332694 |
| chromosome<br>segregation                                                                             | Gene<br>Ontology | GO:0007059 | 1 | 0.027097096 |
| mitotic spindle<br>organization                                                                       | Gene<br>Ontology | GO:0007052 | 1 | 0.027097096 |
| mitotic cytokinesis                                                                                   | Gene<br>Ontology | GO:0000281 | 1 | 0.027860928 |
| collagen trimer                                                                                       | Gene<br>Ontology | GO:0005581 | 1 | 0.027860928 |
| cytoplasmic<br>microtubule                                                                            | Gene<br>Ontology | GO:0005881 | 1 | 0.028624188 |
| extracellular space<br>scavenger receptor<br>activity                                                 | Gene<br>Ontology | GO:0005615 | 3 | 0.029203476 |
| collagen binding                                                                                      | Gene<br>Ontology | GO:0005044 | 1 | 0.030910546 |
| negative regulation of<br>cysteine-type<br>endopeptidase<br>activity involved in<br>apoptotic process | Gene<br>Ontology | GO:0005518 | 1 | 0.031671525 |
| phosphatidylinositol<br>phosphorylation                                                               | Gene<br>Ontology | GO:0043154 | 1 | 0.032431936 |
| phagocytic vesicle<br>cysteine-type<br>endopeptidase<br>activity                                      | Gene<br>Ontology | GO:0046854 | 1 | 0.033951051 |
| axoneme                                                                                               | Gene<br>Ontology | GO:0045335 | 1 | 0.037738908 |
| SH3 domain binding<br>protein<br>homodimerization<br>activity                                         | Gene<br>Ontology | GO:0004197 | 1 | 0.03849478  |
|                                                                                                       | Gene<br>Ontology | GO:0005930 | 1 | 0.039250086 |
|                                                                                                       | Gene<br>Ontology | GO:0017124 | 1 | 0.040004828 |
|                                                                                                       | Gene<br>Ontology | GO:0042803 | 2 | 0.041607835 |

|                        |          |            |   |             |
|------------------------|----------|------------|---|-------------|
|                        | Gene     |            |   |             |
| mitotic spindle        | Ontology | GO:0072686 | 1 | 0.042265666 |
| cellular response to   | Gene     |            |   |             |
| interferon-gamma       | Ontology | GO:0071346 | 1 | 0.042265666 |
| positive regulation of | Gene     |            |   |             |
| MAPK cascade           | Ontology | GO:0043410 | 1 | 0.042265666 |
|                        | Gene     |            |   |             |
| protease binding       | Ontology | GO:0002020 | 1 | 0.043770073 |
|                        | Gene     |            |   |             |
| motile cilium          | Ontology | GO:0031514 | 1 | 0.043770073 |
|                        | Gene     |            |   |             |
| cell division          | Ontology | GO:0051301 | 1 | 0.043770073 |
| positive regulation of |          |            |   |             |
| cytosolic calcium ion  | Gene     |            |   |             |
| concentration          | Ontology | GO:0007204 | 1 | 0.043770073 |
| hematopoietic          |          |            |   |             |
| progenitor cell        | Gene     |            |   |             |
| differentiation        | Ontology | GO:0002244 | 1 | 0.045272229 |
| microtubule-based      | Gene     |            |   |             |
| movement               | Ontology | GO:0007018 | 1 | 0.046772138 |
| negative regulation of |          |            |   |             |
| inflammatory           | Gene     |            |   |             |
| response               | Ontology | GO:0050728 | 1 | 0.046772138 |
| positive regulation of |          |            |   |             |
| protein kinase B       | Gene     |            |   |             |
| signaling              | Ontology | GO:0051897 | 1 | 0.046772138 |
| protein                | Gene     |            |   |             |
| deubiquitination       | Ontology | GO:0016579 | 1 | 0.048269802 |
